# Supplementary material for: Enhancing a clenbuterol immunosensor based on poly(3,4-ethylenedioxythiophene)/multi-walled carbon nanotube performance using response surface methodology
Source: PubMed Central journal article supplement — RSC Adv. 2018 Apr 24;8(28):15522–32. doi: 10.1039/c8ra00109j (PMC9088606; doi:10.1039/c8ra00109j), 2018-04-24
Supplement: RA-008-C8RA00109J-s001.pdf [file RA-008-C8RA00109J-s001.pdf]

**Supplementary Information**

for

**Enhancing clenbuterol immunosensor based on poly(3,4-ethylenedioxythiophene)/multi-walled carbon nanotube performance by response surface methodology**

Nurul Ain A. Talib,<sup>ab</sup> Faridah Salam,<sup>c</sup> Nor Azah Yusof,<sup>ab</sup> Shahrul Ainliah Alang Ahmad,<sup>ab</sup> Mohd Zulkhairi Azid,<sup>d</sup> Razali Mirad<sup>d</sup> and Yusran Sulaiman<sup>\*ab</sup>

<sup>a</sup>*Functional Devices Laboratory, Institute of Advance Technology, Universiti Putra Malaysia, 43400 Serdang, Selangor, Malaysia.*

<sup>b</sup>*Department of Chemistry, Faculty of Science, Universiti Putra Malaysia, 43400 Serdang, Selangor, Malaysia. E-mail: yusran@upm.edu.my. Tel: +60-389466779. Fax: +60-389435380.*

<sup>c</sup>*Biodiagnostic-Biosensor Programme, Biotechnology and Nanotechnology Research Centre, Malaysian Agricultural Research and Development Institute, 43400 Serdang, Selangor, Malaysia.*

<sup>d</sup>*Utilization of Agrobiodiversity Resource Programme, Agrobiodiversity and Environmental Research Centre, Malaysian Agricultural Research and Development Institute, 43400 Serdang, Selangor, Malaysia.*

**Table of contents**

| Content                                                                                                                                                                                                                                                                         | Page no. |
|---------------------------------------------------------------------------------------------------------------------------------------------------------------------------------------------------------------------------------------------------------------------------------|----------|
| Table S1: Central composite design (CCD) for fabrication of PEDOT/MWCNT/Ab-CLB/SPCE using RSM method and results of current response.                                                                                                                                           | 2        |
| Table S2: ANOVA table for response surface quadratic model.                                                                                                                                                                                                                     | 3        |
| Fig. S1. 3D surface plots of peak current as a function of (a) pH vs incubation temperature; (b) pH vs Ag incubation time; (c) pH vs blocking; d) incubation temperature vs Ag incubation time; (e) incubation temperature vs blocking; and (f) Ag incubation time vs blocking. | 4        |

**Table S1.** Central composite design (CCD) for fabrication of PEDOT/MWCNT/Ab-CLB/SPCE using RSM method and results of current response

| Standar<br>d | A:<br>pH | B:<br>Incubation<br>temperature (°C) | C:<br>Ag incubation<br>time (s) | D:<br>Blocking<br>(%) | Current (μA)     |           |
|--------------|----------|--------------------------------------|---------------------------------|-----------------------|------------------|-----------|
|              |          |                                      |                                 |                       | Experimenta<br>l | Predicted |
| 1            | 6.4      | 28                                   | 10                              | 0.00                  | -0.592           | -0.577    |
| 2            | 8.4      | 28                                   | 10                              | 0.00                  | -0.555           | -0.548    |
| 3            | 6.4      | 46                                   | 10                              | 0.00                  | -0.494           | -0.476    |
| 4            | 8.4      | 46                                   | 10                              | 0.00                  | -0.378           | -0.400    |
| 5            | 6.4      | 28                                   | 70                              | 0.00                  | -0.626           | -0.641    |
| 6            | 8.4      | 28                                   | 70                              | 0.00                  | -0.687           | -0.691    |
| 7            | 6.4      | 46                                   | 70                              | 0.00                  | -0.555           | -0.569    |
| 8            | 8.4      | 46                                   | 70                              | 0.00                  | -0.595           | -0.573    |
| 9            | 6.4      | 28                                   | 10                              | 0.10                  | -0.620           | -0.615    |
| 10           | 8.4      | 28                                   | 10                              | 0.10                  | -0.592           | -0.602    |
| 11           | 6.4      | 46                                   | 10                              | 0.10                  | -0.507           | -0.526    |
| 12           | 8.4      | 46                                   | 10                              | 0.10                  | -0.510           | -0.467    |
| 13           | 6.4      | 28                                   | 70                              | 0.10                  | -0.647           | -0.649    |
| 14           | 8.4      | 28                                   | 70                              | 0.10                  | -0.723           | -0.715    |
| 15           | 6.4      | 46                                   | 70                              | 0.10                  | -0.608           | -0.589    |
| 16           | 8.4      | 46                                   | 70                              | 0.10                  | -0.571           | -0.609    |
| 17           | 6.4      | 37                                   | 40                              | 0.05                  | -0.447           | -0.455    |
| 18           | 8.4      | 37                                   | 40                              | 0.05                  | -0.444           | -0.450    |
| 19           | 7.4      | 28                                   | 40                              | 0.05                  | -0.403           | -0.408    |
| 20           | 7.4      | 46                                   | 40                              | 0.05                  | -0.296           | -0.305    |
| 21           | 7.4      | 37                                   | 10                              | 0.05                  | -0.473           | -0.510    |
| 22           | 7.4      | 37                                   | 70                              | 0.05                  | -0.636           | -0.613    |
| 23           | 7.4      | 37                                   | 40                              | 0.00                  | -0.427           | -0.436    |
| 24           | 7.4      | 37                                   | 40                              | 0.10                  | -0.468           | -0.474    |
| 25           | 7.4      | 37                                   | 40                              | 0.05                  | -0.453           | -0.416    |
| 26           | 7.4      | 37                                   | 40                              | 0.05                  | -0.421           | -0.416    |

**Table S2.** ANOVA table for response surface quadratic model

| Source          | Sum of squares ( $10^{-3}$ ) | Degree of freedom | Mean square ( $10^{-3}$ ) | F-value | Prob > F | Significant     |
|-----------------|------------------------------|-------------------|---------------------------|---------|----------|-----------------|
| Model           | 260.74                       | 14                | 18.62                     | 20.627  | < 0.0001 | Significant     |
| A               | 0.09                         | 1                 | 0.09                      | 0.102   | 0.7556   |                 |
| B               | 48.03                        | 1                 | 48.03                     | 53.189  | < 0.0001 | Significant     |
| C               | 47.76                        | 1                 | 47.76                     | 52.899  | < 0.0001 | Significant     |
| D               | 6.24                         | 1                 | 6.24                      | 6.913   | 0.0234   | Significant     |
| A <sup>2</sup>  | 3.44                         | 1                 | 3.44                      | 3.812   | 0.0768   |                 |
| B <sup>2</sup>  | 9.06                         | 1                 | 9.06                      | 10.030  | 0.0090   | Significant     |
| C <sup>2</sup>  | 54.41                        | 1                 | 54.41                     | 60.262  | < 0.0001 | Significant     |
| D <sup>2</sup>  | 3.89                         | 1                 | 3.89                      | 4.303   | 0.0623   |                 |
| AB              | 2.12                         | 1                 | 2.12                      | 2.347   | 0.1538   |                 |
| AC              | 6.26                         | 1                 | 6.26                      | 6.928   | 0.0233   | Significant     |
| AD              | 0.27                         | 1                 | 0.27                      | 0.303   | 0.5932   |                 |
| BC              | 0.86                         | 1                 | 0.86                      | 0.947   | 0.3513   |                 |
| BD              | 0.16                         | 1                 | 0.16                      | 0.172   | 0.6863   |                 |
| CD              | 0.92                         | 1                 | 0.92                      | 1.014   | 0.3355   |                 |
| Residual        | 9.93                         | 11                | 0.90                      |         |          |                 |
| Lack of fit     | 9.42                         | 10                | 0.94                      | 1.835   | 0.5227   | Not significant |
| Pure error      | 0.51                         | 1                 | 0.51                      |         |          |                 |
| Corrected total | 270.68                       | 25                |                           |         |          |                 |

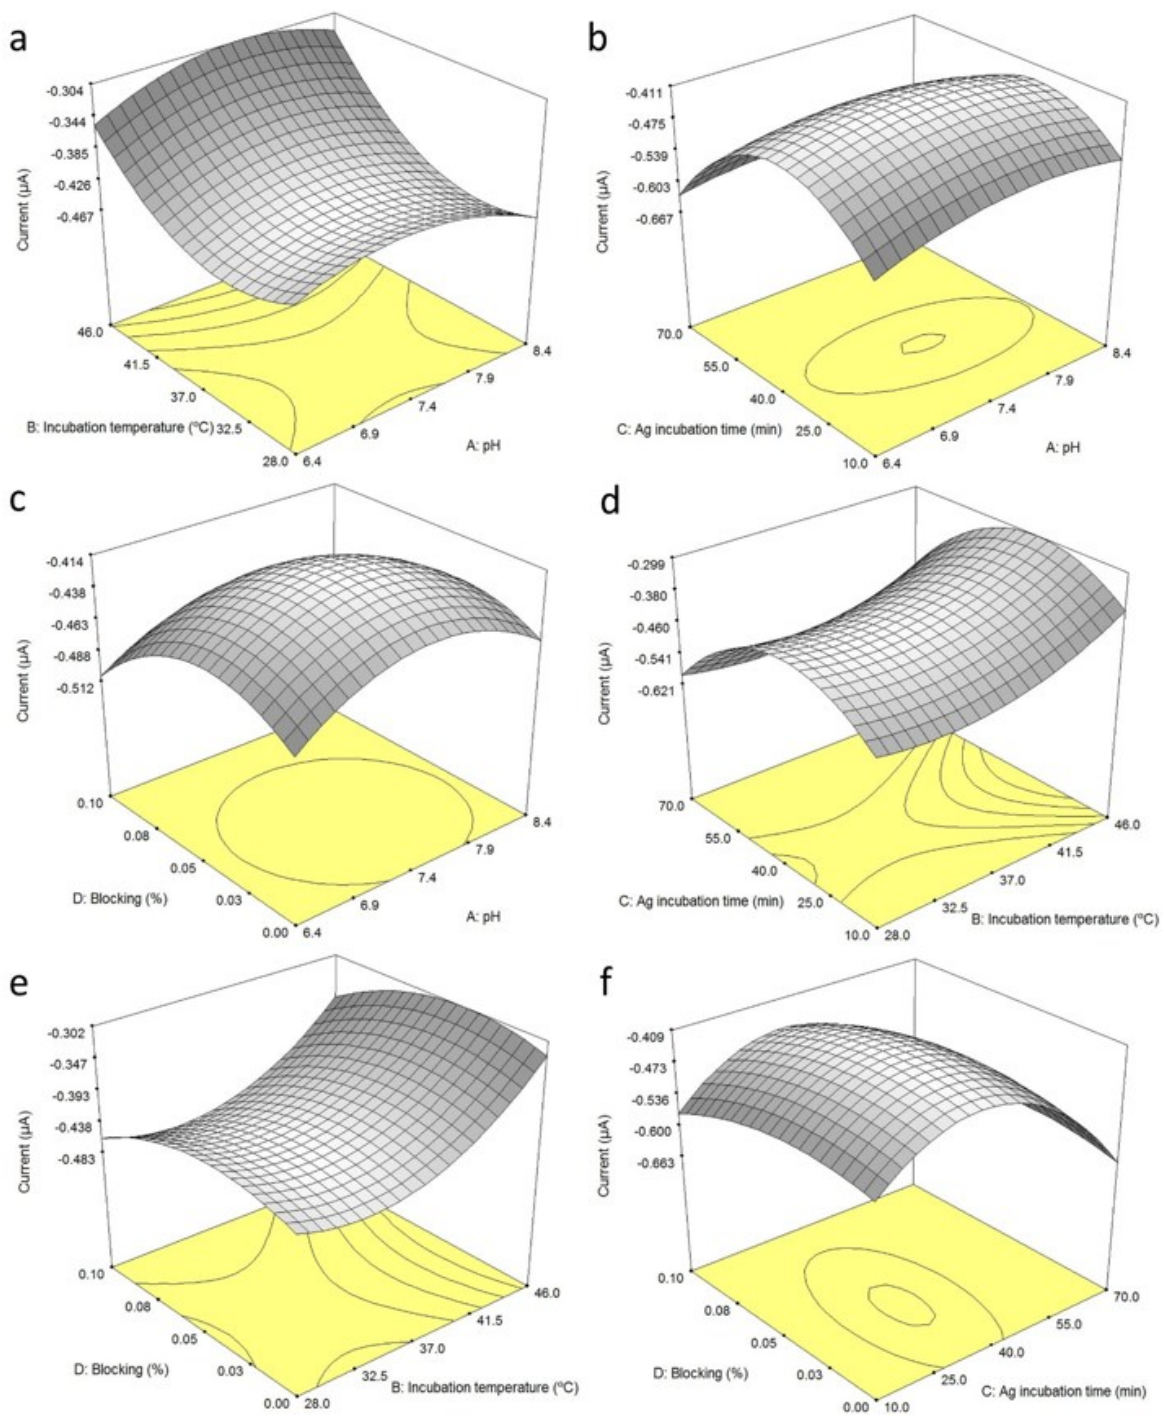

**Fig. S1.** 3D surface plots of peak current as a function of (a) pH vs incubation temperature; (b) pH vs Ag incubation time; (c) pH vs blocking; (d) incubation temperature vs Ag incubation time; (e) incubation temperature vs blocking; and (f) Ag incubation time vs blocking.
